# Supplementary material for: Dimensional changes of commercial and novel polyvinyl siloxane impression materials following sodium hypochlorite disinfection
Source: PeerJ. 2022 Jan 28;10:e12812. doi: 10.7717/peerj.12812 (PMC8802710; doi:10.7717/peerj.12812)
Supplement: Supplemental Information 1 — The raw data collected during the experimental work in the laboratory for all commercial and experimental materials used in this study including individual files for all materials separately and a combined file after analysis the data along with the graphic representation.arrahcs/EvoloPy-FS. [file peerj-10-12812-s001.xlsx]

## Sheet: Comml and Exp
Linear Dimensional Changes in DW and 1%NaOCl for 24 hours (Comml and Exp VPS)
Time (minutes)	0 min	10 min	30 min	60 min	1440 min
Aq M (DW)	0	0.0311679	0.0623109	0.0730175	0.114731
Elt M (DW)	0	0	0.0317993	0.0317993	0.0739666
Extr M (DW)	0	0.0310099	0.0412297	0.0724926	0.124519
Exp-I (DW)	0	0	0.0205446	0.031121	0.072862
Exp-II (DW)	0	0.0103146	0.0204875	0.0308075	0.0858515
Exp-III (DW)	0	0.0104548	0.0309851	0.0411529	0.102821
Exp-IV (DW)	0	0.0320535	0.0423787	0.053172	0.105844
Exp-V (DW)	0	0.0302948	0.0403199	0.0503349	0.111094
Aq M (NaOCl)	0	0.0313437	0.0580482	0.0580482	0.105126
Elt M (DW)	0	0	0.0205723	0.0416307	0.0629895
Extr M (NaOCl)	0	0.0351378	0.0457479	0.0457479	0.09165
Exp-I (NaOCl)	0	0.0104384	0.0104384	0.020785	0.0519714
Exp-II (NaOCl)	0	0.0204375	0.0306939	0.0411433	0.0721238
Exp-III (NaOCl)	0	0.0308923	0.0411487	0.0516035	0.0721565
Exp-IV (NaOCl)	0	0.0210272	0.0316092	0.042015	0.0943661
Exp-V (NaOCl)	0	0.0303826	0.0404939	0.0505644	0.0909721
SD-Linear Dimensional Changes in DW and 1%NaOCl for 24 hours (Comml and Exp VPS)
Time (minutes)	0 min	10 min	30 min	60 min	1440 min
Aq M (DW)	0	0.0284699	0.022759	0.0292606	0.0256644
Elt M (DW)	0	0	0.0290318	0.0290318	0.0475434
Extr M (DW)	0	0.0283106	0.0428597	0.0583074	0.0579432
Exp-I (DW)	0	0	0.028132	0.0284164	0.0287869
Exp-II (DW)	0	0.0230641	0.0280548	0.0281248	0.0436909
Exp-III (DW)	0	0.0233776	0.0465505	0.0435458	0.0642207
Exp-IV (DW)	0	0.0292632	0.0237063	0.0381725	0.0390731
Exp-V (DW)	0	0.0276575	0.0225428	0.0354109	0.0218915
Aq M (NaOCl)	0	0.0286202	0.0285373	0.0285373	0.0499701
Elt M (DW)	0	0	0.0281715	0.0232825	0.0238433
Extr M (NaOCl)	0	0.0330242	0.0268594	0.0268594	0.03826
Exp-I (NaOCl)	0	0.023341	0.023341	0.0284615	0.0369069
Exp-II (NaOCl)	0	0.027995	0.0280294	0.0230166	0.027489
Exp-III (NaOCl)	0	0.0282145	0.0230199	0.0369758	0.0275886
Exp-IV (NaOCl)	0	0.0287952	0.028858	0.0436509	0.0438623
Exp-V (NaOCl)	0	0.0277387	0.0226409	0.0356074	0.0422459

## Sheet: Aq-DW
Linear Dimensional Changes: Aquasil Monophase in DW for 24 hours
Key
t = Time					Locations	Thickness (mm) just before immersion
S = Sample						S 1	S 2	S 3	S 4	S 5
Ch = Change					1	1.882	1.949	1.97
Re = Reading					2	1.918	2.006	1.971
Avg = Average					3	1.897	1.979	1.927
P = Present					4
mm = millimeter					5
					Avg
					SD						% Dimensional Changes
Date Re	Day	P Room temp	Time Re	min&hrs	t (min)	S 1 (mm)	S 2 (mm)	S 3 (mm)	S 4 (mm)	S 5 (mm)	S 1	S 2	S 3	S 4	S 5	Average	SD
				0	0	8.308	8.392	10.182	8.174	8.31	0	0	0	0	0	0	0
				10	10	8.31	8.394	10.182	8.176	8.31	0.0514933	0.050813	0	0.0535332	0	0.0311679	0.0284699
				30	30	8.312	8.394	10.184	8.176	8.312	0.102987	0.050813	0.0522466	0.0535332	0.0519751	0.0623109	0.022759
				1 hr	60	8.312	8.394	10.184	8.178	8.312	0.102987	0.050813	0.0522466	0.107066	0.0519751	0.0730175	0.0292606
				24 hrs	1440	8.312	8.396	10.186	8.18	8.314	0.102987	0.101626	0.104493	0.1606	0.10395	0.114731	0.0256644
				Fixed Pin Reading		4.424	4.456	6.354	4.438	4.462
				Original Length (mm)		3.884	3.936	3.828	3.736	3.848
					Locations	Thickness (mm) immediately after 24 hrs
						S 1	S 2	S 3	S 4	S 5
					1	1.916	1.879	1.957
					2	1.915	1.942	1.988
					3	1.908	1.967	2.003
					4	1.925	1.968	1.982
					5	1.98	1.98	1.961
					Avg
					SD

## Sheet: Aq-NaOCl
Aquasil Monophase in NaOCl for 24 hours (Linear Dimensional Changes)
Key
t = Time					Locations	Thickness (mm) just before immersion
S = Sample						S 1	S 2	S 3	S 4	S 5
Ch = Change					1	1.945	1.935	1.967
Re = Reading					2	1.977	1.953	1.978
Avg = Average					3	1.947	1.943	1.955
P = Present					4	1.939	1.914	1.955
mm = millimeter					5	1.944	1.933	1.955
					Avg	1.9504	1.9356	1.962
					SD	0.0151592	0.0144153	0.0103441			% Dimensional Changes
Date Re	Day	P Room temp	Time Re	min&hrs	t (min)	S 1 (mm)	S 2 (mm)	S 3 (mm)	S 4 (mm)	S 5 (mm)	S 1	S 2	S 3	S 4	S 5	Average	SD
				0	0	12.744	13.668	13.212	10.982	13.668	0	0	0	0	0	0	0
				10	10	12.746	13.67	13.214	10.982	13.668	0.0512821	0.0523013	0.053135	0	0	0.0313437	0.0286202
				30	30	12.746	13.67	13.216	10.984	13.67	0.0512821	0.0523013	0.10627	0.0298063	0.0505817	0.0580482	0.0285373
				1 hr	60	12.746	13.67	13.216	10.984	13.67	0.0512821	0.0523013	0.10627	0.0298063	0.0505817	0.0580482	0.0285373
				24 hrs	1440	12.748	13.67	13.218	10.986	13.674	0.102564	0.0523013	0.159405	0.0596125	0.151745	0.105126	0.0499701
				Fixed Pin Reading		8.844	9.844	9.448	4.272	9.714
				Original Length (mm)		3.9	3.824	3.764	6.71	3.954
					Locations	Thickness (mm) immediately after 24 hrs
						S 1	S 2	S 3	S 4	S 5
					1	1.954	1.877	1.958
					2	1.982	1.884	1.986
					3	1.979	1.973	2.018
					4	1.965	1.986	2.018
					5	1.921	1.988	2.02
					Avg	1.9602	1.9416	2
					SD	0.0246313	0.0561275	0.0274226

## Sheet: Elt-DW
Elite HD Monophase in DW for 24 hours (Linear Dimensional Changes)
Key
t = Time					Locations	Thickness (mm) just before immersion
S = Sample						S 1	S 2	S 3	S 4	S 5
Ch = Change					1
Re = Reading					2
Avg = Average					3
P = Present					4
mm = millimeter					5
					Avg
					SD						% Dimensional Changes
Date Re	Day	P Room temp	Time Re	min&hrs	t (min)	S 1 (mm)	S 2 (mm)	S 3 (mm)	S 4 (mm)	S 5 (mm)	S 1	S 2	S 3	S 4	S 5	Average	SD
				0	0	10.398	8.96	7.084	7.564	8.282	0	0	0	0	0	0	0
				10	10	10.398	8.96	7.084	7.564	8.282	0	0	0	0	0	0	0
				30	30	10.398	8.962	7.084	7.566	8.284	0	0.0536193	0	0.0529661	0.0524109	0.0317993	0.0290318
				1 hr	60	10.398	8.962	7.084	7.566	8.284	0	0.0536193	0	0.0529661	0.0524109	0.0317993	0.0290318
				24 hrs	1440	10.398	8.964	7.086	7.568	8.286	0	0.107239	0.0518403	0.105932	0.104822	0.0739666	0.0475434
				Fixed Pin Reading		6.718	5.23	3.226	3.788	4.466
				Original Length (mm)		3.68	3.73	3.858	3.776	3.816
					Locations	Thickness (mm) immediately after 24 hrs
						S 1	S 2	S 3	S 4	S 5
					1
					2
					3
					4
					5
					Avg
					SD

## Sheet: Elte-NaOCl
Elite HD Monophase in 1%NaOCl for 24 hours (Linear Dimensional Changes)
Key
t = Time					Locations	Thickness (mm) just before immersion
S = Sample						S 1	S 2	S 3	S 4	S 5
Ch = Change					1
Re = Reading					2
Avg = Average					3
P = Present					4
mm = millimeter					5
					Avg
					SD						% Dimensional Changes
Date Re	Day	P Room temp	Time Re	min&hrs	t (min)	S 1 (mm)	S 2 (mm)	S 3 (mm)	S 4 (mm)	S 5 (mm)	S 1	S 2	S 3	S 4	S 5	Average	SD
				0	0	9.04	8.96	9.87	6.146	6.972	0	0	0	0	0	0	0
				10	10	9.04	8.96	9.87	6.146	6.972	0	0	0	0	0	0	0
				30	30	9.042	8.96	9.87	6.148	6.972	0.0518672	0	0	0.0509944	0	0.0205723	0.0281715
				1 hr	60	9.042	8.962	9.87	6.148	6.974	0.0518672	0.0527983	0	0.0509944	0.0524934	0.0416307	0.0232825
				24 hrs	1440	9.042	8.964	9.872	6.148	6.974	0.0518672	0.105597	0.0539957	0.0509944	0.0524934	0.0629895	0.0238433
				Fixed Pin Reading		5.184	5.172	6.166	2.224	3.162
				Original Length (mm)		3.856	3.788	3.704	3.922	3.81
					Locations	Thickness (mm) immediately after 24 hrs
						S 1	S 2	S 3	S 4	S 5
					1
					2
					3
					4
					5
					Avg
					SD

## Sheet: Extr-DW
Extrude Medium Bodied in DW for 24 hours (Linear Dimensional Changes)
Key
t = Time					Locations	Thickness (mm) just before immersion
S = Sample						S 1	S 2	S 3	S 4	S 5
Ch = Change					1
Re = Reading					2
Avg = Average					3
P = Present					4
mm = millimeter					5
					Avg
					SD						% Dimensional Changes
Date Re	Day	P Room temp	Time Re	min&hrs	t (min)	S 1 (mm)	S 2 (mm)	S 3 (mm)	S 4 (mm)	S 5 (mm)	S 1	S 2	S 3	S 4	S 5	Average	SD
				0	0	10.324	8.436	7.002	8.622	11.008	0	0	0	0	0	0	0
				10	10	10.326	8.438	7.002	8.624	11.008	0.0510986	0.0521376	0	0.0518135	0	0.0310099	0.0283106
				30	30	10.328	8.438	7.002	8.624	11.008	0.102197	0.0521376	0	0.0518135	0	0.0412297	0.0428597
				1 hr	60	10.33	8.44	7.004	8.624	11.008	0.153296	0.104275	0.0530786	0.0518135	0	0.0724926	0.0583074
				24 hrs	1440	10.332	8.442	7.006	8.626	11.01	0.204394	0.156413	0.106157	0.103627	0.0520021	0.124519	0.0579432
				Fixed Pin Reading		6.41	4.6	3.234	4.762	7.162
				Original Length (mm)		3.914	3.836	3.768	3.86	3.846
					Locations	Thickness (mm) immediately after 24 hrs
						S 1	S 2	S 3	S 4	S 5
					1
					2
					3
					4
					5
					Avg
					SD

## Sheet: Extr-NaOCl
Extrude Medium Bodied in NaOCl for 24 hours (Linear Dimensional Changes)
Key
t = Time					Locations	Thickness (mm) just before immersion
S = Sample						S 1	S 2	S 3	S 4	S 5
Ch = Change					1
Re = Reading					2
Avg = Average					3
P = Present					4
mm = millimeter					5
					Avg
					SD						% Dimensional Changes
Date Re	Day	P Room temp	Time Re	min&hrs	t (min)	S 1 (mm)	S 2 (mm)	S 3 (mm)	S 4 (mm)	S 5 (mm)	S 1	S 2	S 3	S 4	S 5	Average	SD
				0	0	10.98	8.502	8.02	13.614	9.932	0	0	0	0	0	0	0
				10	10	10.98	8.502	8.022	13.616	9.934	0	0	0.0542888	0.050226	0.0711744	0.0351378	0.0330242
				30	30	10.982	8.502	8.022	13.616	9.934	0.0530504	0	0.0542888	0.050226	0.0711744	0.0457479	0.0268594
				1 hr	60	10.982	8.502	8.022	13.616	9.934	0.0530504	0	0.0542888	0.050226	0.0711744	0.0457479	0.0268594
				24 hrs	1440	10.982	8.504	8.024	13.618	9.936	0.0530504	0.0538213	0.108578	0.100452	0.142349	0.09165	0.03826
				Fixed Pin Reading		7.21	4.786	4.336	9.632	7.122
				Original Length (mm)		3.77	3.716	3.684	3.982	2.81
					Locations	Thickness (mm) immediately after 24 hrs
						S 1	S 2	S 3	S 4	S 5
					1
					2
					3
					4
					5
					Avg
					SD

## Sheet: Exp-I-DW
Exp-I (Comp 131) in DW for 24 hours: Linear Dimensional Changes
Key
t = Time					Locations	Thickness (mm) just before immersion
S = Sample						S 1	S 2	S 3	S 4	S 5
Ch = Change					1
Re = Reading					2
Avg = Average					3
P = Present					4
mm = millimeter					5
					Avg
					SD						% Dimensional Changes
Date Re	Day	P Room temp	Time Re	min&hrs	t (min)	S 1 (mm)	S 2 (mm)	S 3 (mm)	S 4 (mm)	S 5 (mm)	S 1	S 2	S 3	S 4	S 5	Average	SD
				0	0	9.31	8.15	6.264	8.654	8.292	0	0	0	0	0	0	0
				10	10	9.31	8.15	6.264	8.654	8.292	0	0	0	0	0	0	0
				30	30	9.312	8.15	6.266	8.654	8.292	0.0514933	0	0.0512295	0	0	0.0205446	0.028132
				1 hr	60	9.312	8.15	6.266	8.654	8.294	0.0514933	0	0.0512295	0	0.0528821	0.031121	0.0284164
				24 hrs	1440	9.314	8.152	6.266	8.656	8.296	0.102987	0.0521376	0.0512295	0.0521921	0.105764	0.072862	0.0287869
				Fixed Pin Reading		5.426	4.314	2.36	4.822	4.51
				Original Length (mm)		3.884	3.836	3.904	3.832	3.782
					Locations	Thickness (mm) immediately after 24 hrs
						S 1	S 2	S 3	S 4	S 5
					1
					2
					3
					4
					5
					Avg
					SD

## Sheet: Exp-I-NaOCl
Exp-I (Comp 131) in 1% NaOCl for 24 hours: Linear Dimensional Changes
Key
t = Time					Locations	Thickness (mm) just before immersion
S = Sample						S 1	S 2	S 3	S 4	S 5
Ch = Change					1
Re = Reading					2
Avg = Average					3
P = Present					4
mm = millimeter					5
					Avg
					SD						% Dimensional Changes
Date Re	Day	P Room temp	Time Re	min&hrs	t (min)	S 1 (mm)	S 2 (mm)	S 3 (mm)	S 4 (mm)	S 5 (mm)	S 1	S 2	S 3	S 4	S 5	Average	SD
				10	10	9.284	7.214	7.244	7.758	8.18	0	0	0	0	0	0	0
				10	10	9.286	7.214	7.244	7.758	8.18	0.0521921	0	0	0	0	0.0104384	0.023341
				30	30	9.286	7.214	7.244	7.758	8.18	0.0521921	0	0	0	0	0.0104384	0.023341
				1 hr	60	9.286	7.214	7.246	7.758	8.18	0.0521921	0	0.0517331	0	0	0.020785	0.0284615
				24 hrs	1440	9.288	7.216	7.246	7.758	8.182	0.104384	0.0514933	0.0517331	0	0.0522466	0.0519714	0.0369069
				Fixed Pin Reading		5.452	3.33	3.378	3.856	4.352
				Original Length (mm)		3.832	3.884	3.866	3.902	3.828
					Locations	Thickness (mm) immediately after 24 hrs
						S 1	S 2	S 3	S 4	S 5
					1
					2
					3
					4
					5
					Avg
					SD

## Sheet: Exp-II-DW
Exp-II (Comp 132) in DW for 24 hours: Linear Dimensional Changes
Method: Chesterman Travelling Microscope (Magnification10x, accuracy 0.02 mm)
Key					Locations	Thickness (mm) just before immersion
t = Time						S 1	S 2	S 3	S 4	S 5
S = Sample					1
Ch = Change					2
Re = Reading					3
Avg = Average					4
P = Present					5
mm = millimeter					Avg
					SD						% Dimensional Changes
Date Re	Day	P Room temp	Time Re	min&hrs	t (min)	S 1 (mm)	S 2 (mm)	S 3 (mm)	S 4 (mm)	S 5 (mm)	S 1	S 2	S 3	S 4	S 5	Average	SD
				0	0	9.596	8.162	7.084	8.664	8.384	0	0	0	0	0	0	0
				10	10	9.598	8.162	7.084	8.664	8.384	0.051573	0	0	0	0	0.0103146	0.0230641
				30	30	9.598	8.164	7.084	8.664	8.384	0.051573	0.0508647	0	0	0	0.0204875	0.0280548
				1 hr	60	9.598	8.164	7.084	8.666	8.384	0.051573	0.0508647	0	0.0515996	0	0.0308075	0.0281248
				24 hrs	1440	9.602	8.166	7.086	8.666	8.386	0.154719	0.101729	0.0704225	0.0515996	0.0507872	0.0858515	0.0436909
				Fixed Pin Reading		5.718	4.23	4.244	4.788	4.446
				Original Length (mm)		3.878	3.932	2.84	3.876	3.938
					Locations	Thickness (mm) immediately after 24 hrs
						S 1	S 2	S 3	S 4	S 5
					1
					2
					3
					4
					5
					Avg
					SD

[truncated: 7 more sheets: Exp-II-NaOCl, Exp-III-DW, Exp-III-NaOCl, Exp-IV-DW, Exp-IV-NaOCl, Exp-V-DW, Exp-V-NaOCl]
